# Supplementary material for: Risk factors for pressure injury development in critically ill patients in the intensive care unit: a systematic review protocol
Source: PubMed Central journal article supplement (PMC5359849; doi:10.1186/s13643-017-0451-5), 2017-03-20
Supplement: 13643_2017_451_MOESM2_ESM.pdf [file 13643_2017_451_MOESM2_ESM.pdf]

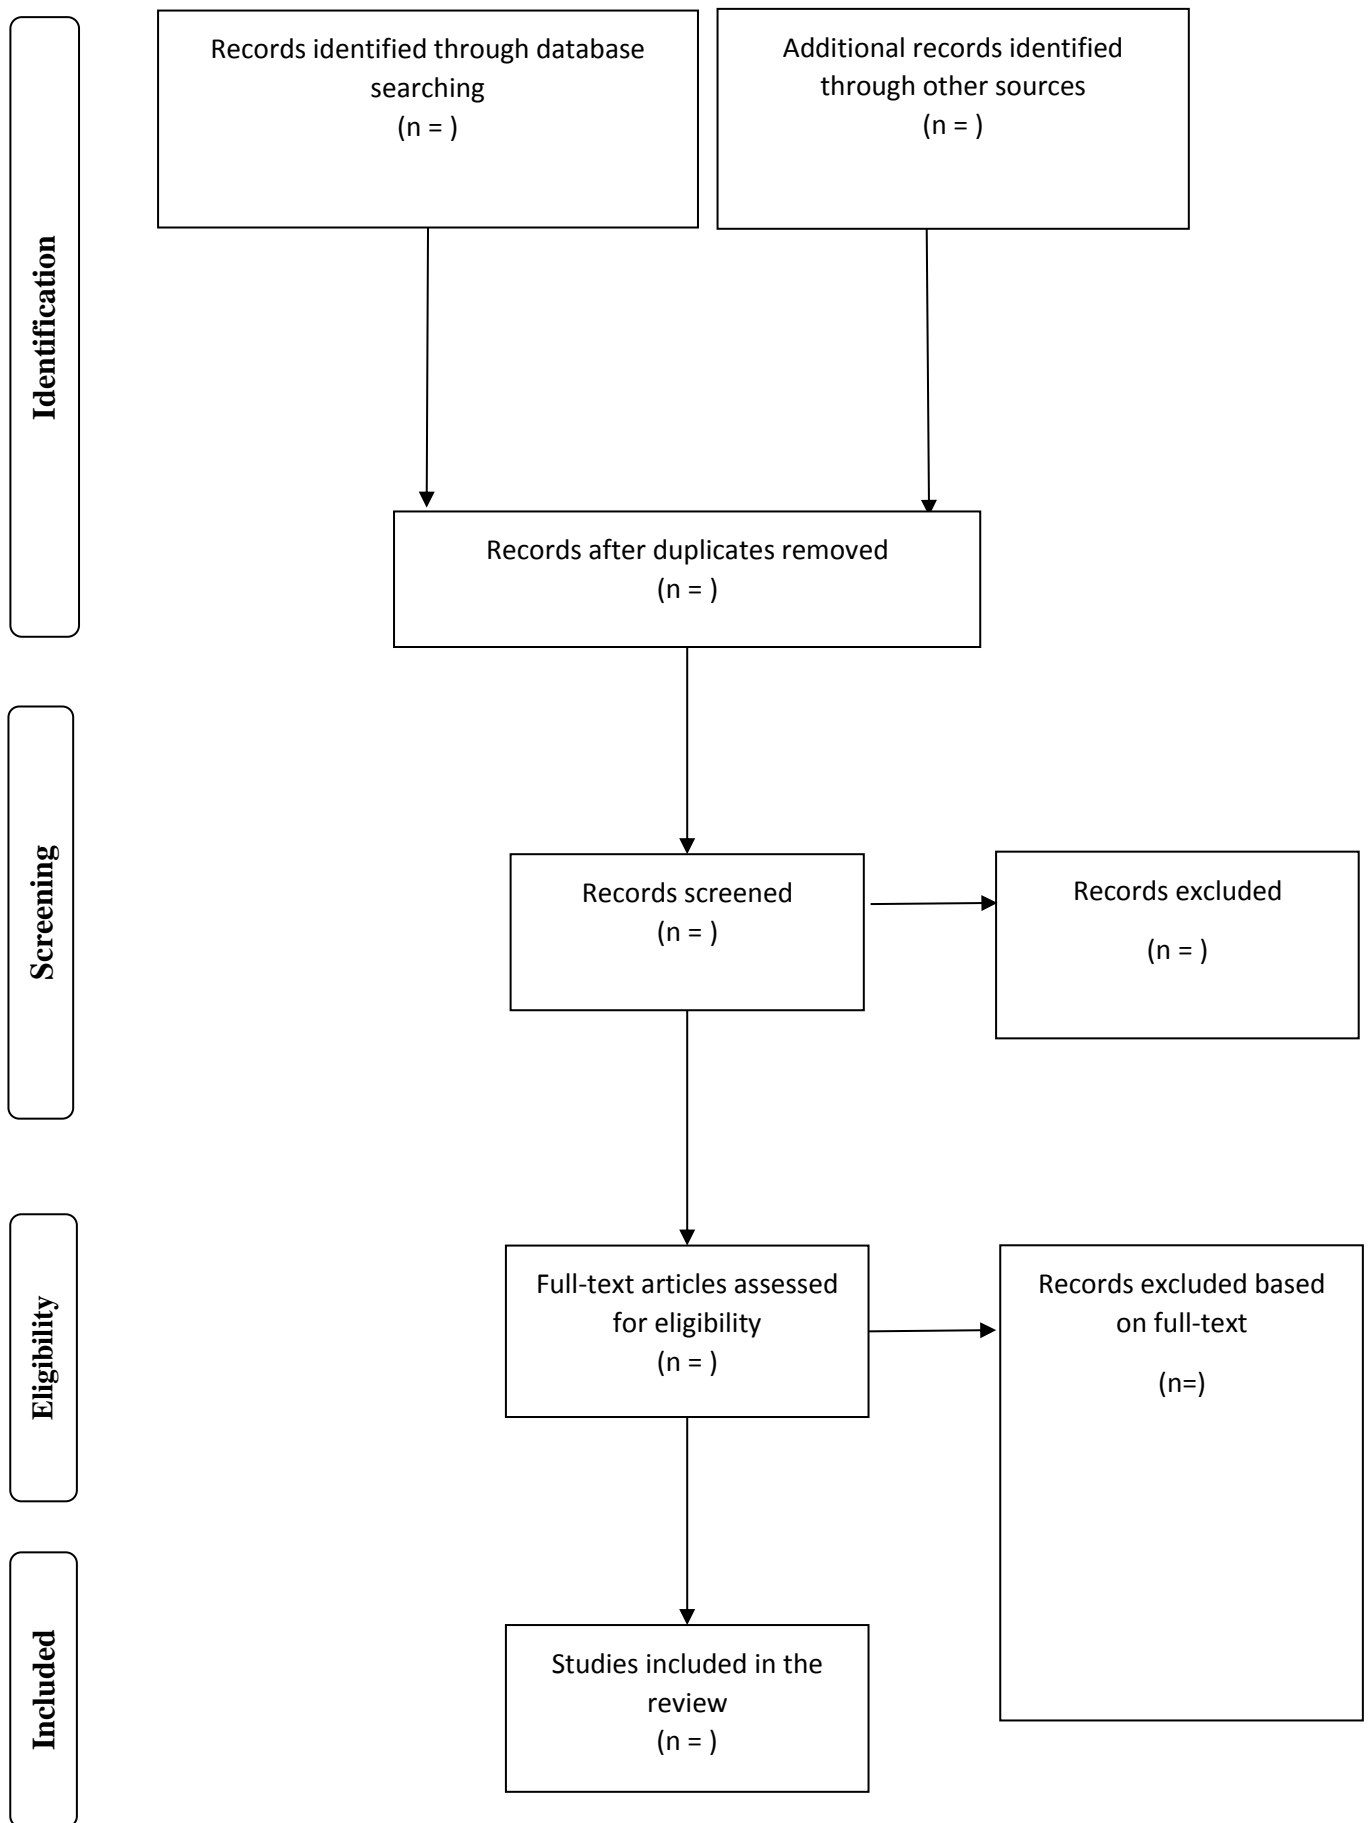

**Figure1.** Literature searches, screening and selection of articles for inclusion.
